# Supplementary material
Source: Springer Nature journal article supplement (https://www.springermedizin.de/resource/supplementary/12885_2014_4774_MOESM5_ESM.pdf/9467256)

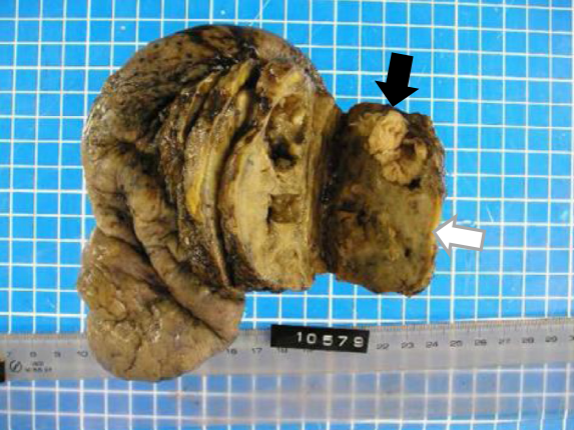

Supplement: MOESM5 [file 9467256]
